# Supplementary material for: A Bibliometric Meta-Analysis of Colistin Resistance in Klebsiella pneumoniae
Source: MDPI journal article supplement (doi:10.3390/diseases9020044), 2021-06-20
Supplement: s1 [file s1]

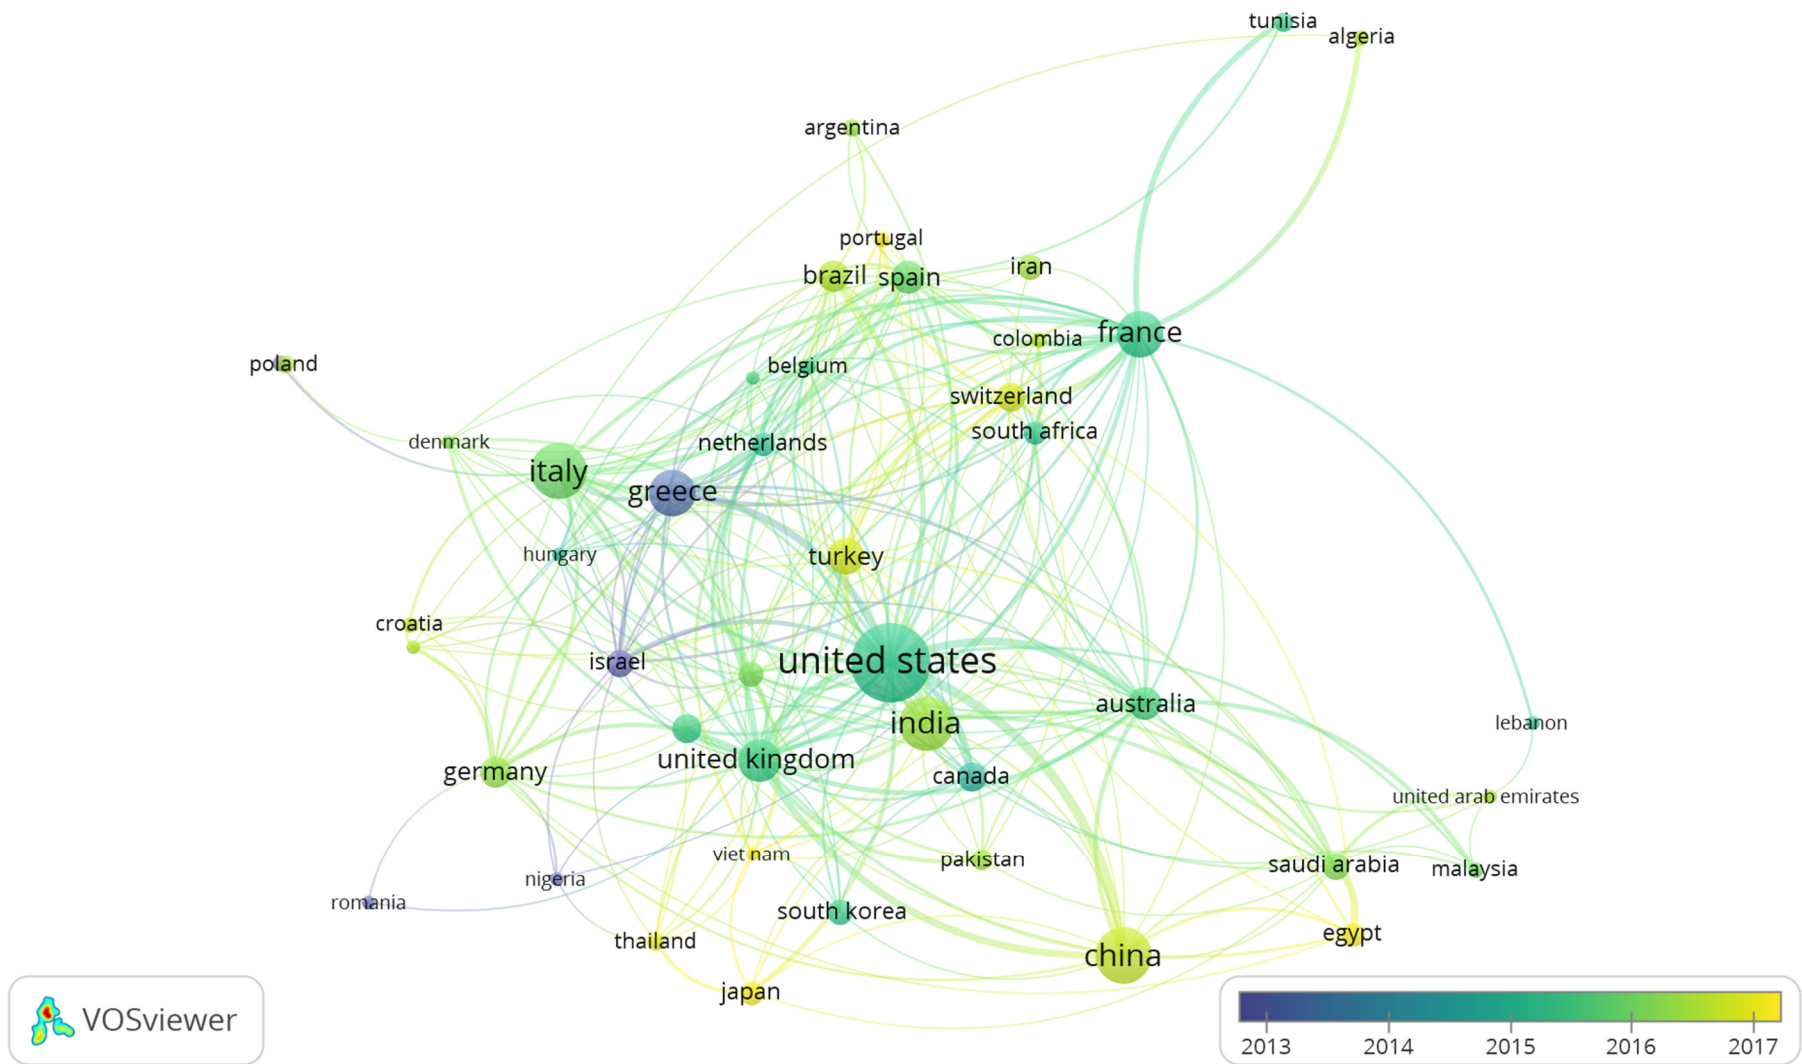

Figure S1. Overlay of countries, showing countries with the most currently published articles relating to colistin resistance in *K. pneumoniae*.
